# Supplementary material for: Sequential crystallization of sea urchin-like bimetallic (Ni, Co) carbonate hydroxide and its morphology conserved conversion to porous NiCo2O4 spinel for pseudocapacitors
Source: Royal Society of Chemistry journal article supplement (doi:10.1039/c1ra00342a), 2011-01-01
Supplement: c1ra00342a.pdf [file c1ra00342a.pdf]

## Electronic Supplementary Information

**Sequential Crystallization of Sea Urchin-like Bimetallic (Ni, Co) Carbonate Hydroxide and Its Morphology Conserved Conversion to Porous NiCo<sub>2</sub>O<sub>4</sub> Spinel for Pseudocapacitors**

*Junwu Xiao and Shihe Yang\**

Department of Chemistry, William Mong Institute of Nano Science and Technology,  
The Hong Kong University of Science and Technology, Clear Water Bay, Kowloon,  
Hong Kong (China)

E-mail: [chsyang@ust.hk](mailto:chsyang@ust.hk)

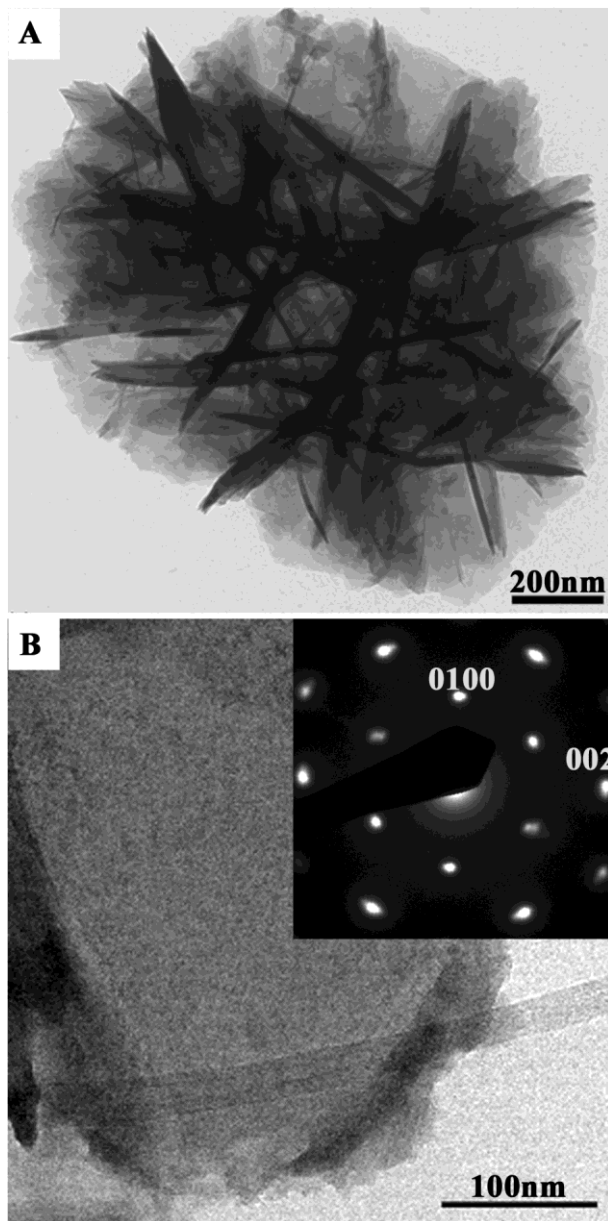

**Figure SI-1.** TEM images of (A) flower-like nickel carbonate hydroxide and (B) the corresponding building block nanoplates (Inset: the SAED pattern of nanoplates).

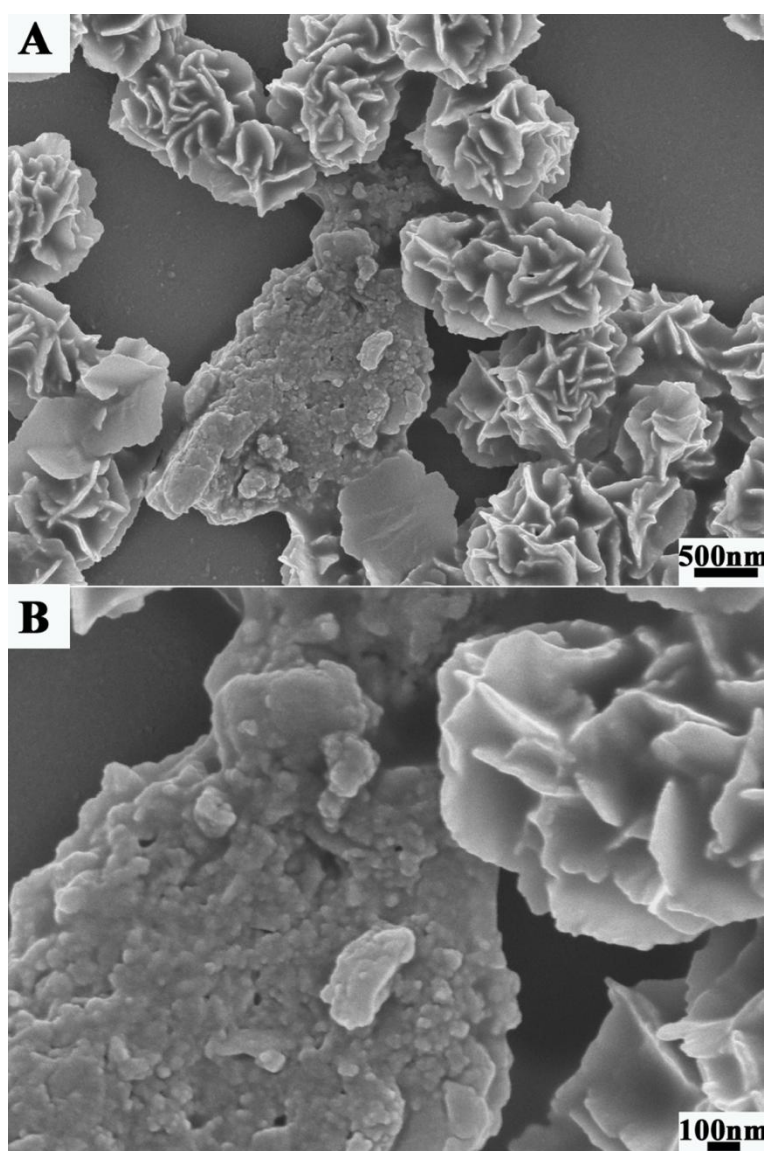

**Figure SI-2.** SEM images of nickel carbonate hydroxide after 1.5 h reaction: (A) low and (B) high magnifications. It's suggested that flower-like nickel carbonate hydroxide are crystallized from nanoparticles with less than 100 nm in a diameter.

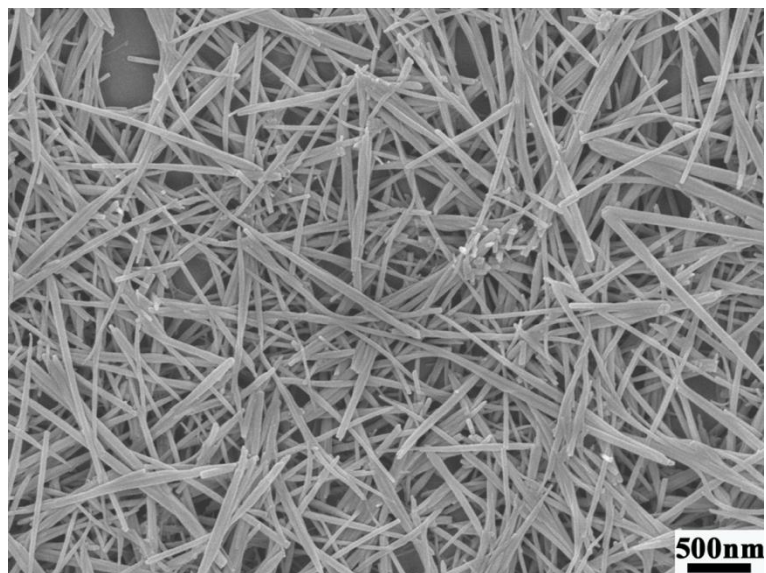

**Figure SI-3.** SEM images of cobalt carbonate hydroxide formed after 1.5 h reaction.

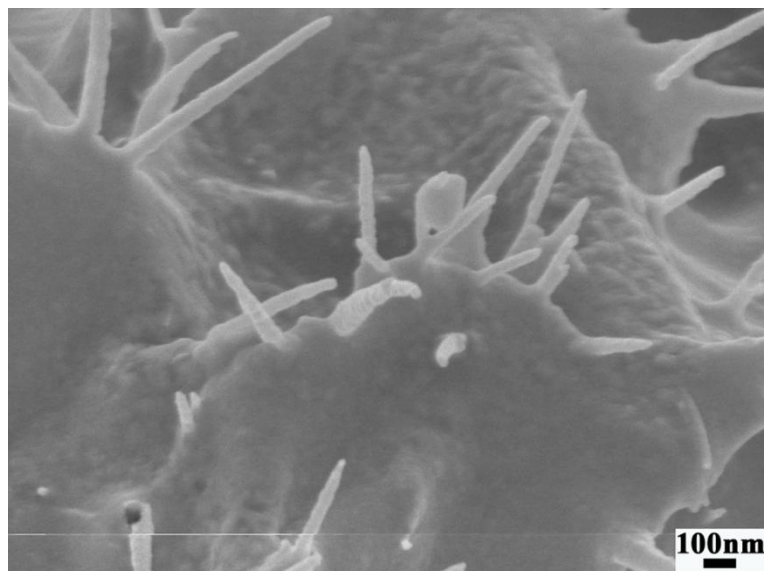

**Figure SI-4.** SEM images of bimetallic carbonate hydroxide formed at the Co/Ni molar ratio of 2:1 after 2.5 h reaction. Bimetallic carbonate hydroxide nanorods are nucleated and grown at the edge of nickel carbonate hydroxide nanoplates.

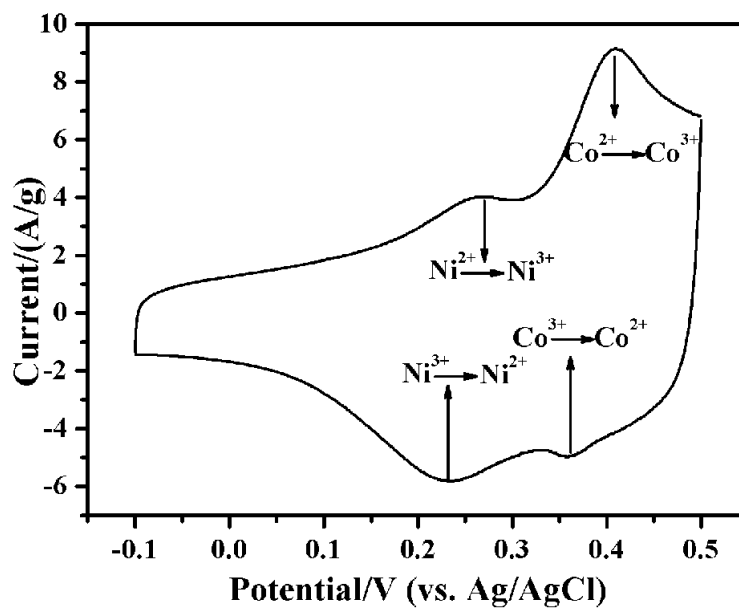

**Figure SI-5.** CV of a  $\text{NiCo}_2\text{O}_4$  electrode in 1.0 M KOH solution at a scan rate of 5 mV/s. Note that the oxidation of  $\text{Ni}^{2+}$  and the reduction of  $\text{Co}^{3+}$  are more difficult to discern.
